# Supplementary material
Source: PubMed Central journal article supplement (PMC7917153)
Supplement: NIHMS1621218-supplement-Supplemental_Digital_Content_to_Be_Published__cited_in_text_.pdf [file NIHMS1621218-supplement-Supplemental_Digital_Content_to_Be_Published__cited_in_text_.pdf]

## **DESCRIPTION OF SUPPORTING INFORMATION**

### **SUPPLEMENTARY FIGURE 1**

Quantitative polymerase chain reaction analysis of bronchoalveolar lavage cells in lung transplant recipients with bronchiolitis obliterans syndrome (BOS) demonstrated upregulated mRNA levels of CXCL13, CD8A, KLRK1 and CTLA4, none of which were significant.

### **SUPPLEMENTARY FIGURE 2**

(A) Exosomes from bronchoalveolar lavage fluid from lung transplant recipients (LTxRs) contain self-antigens (CIITA, 20S proteasome, NFκB, CD56, NKG2D, FasL, and perforin) in LTxRs with BOS (n=2) compared with stable LTxRs (n=2). (B) Exosomes from plasma samples of healthy volunteers (HV), stable LTxRs, and LTxRs with BOS contain CD56, NKG2D, FasL and perforin; HV (n=10) BOS (n=14) LTxRs cohorts compared with stable LTxRs (n=14).

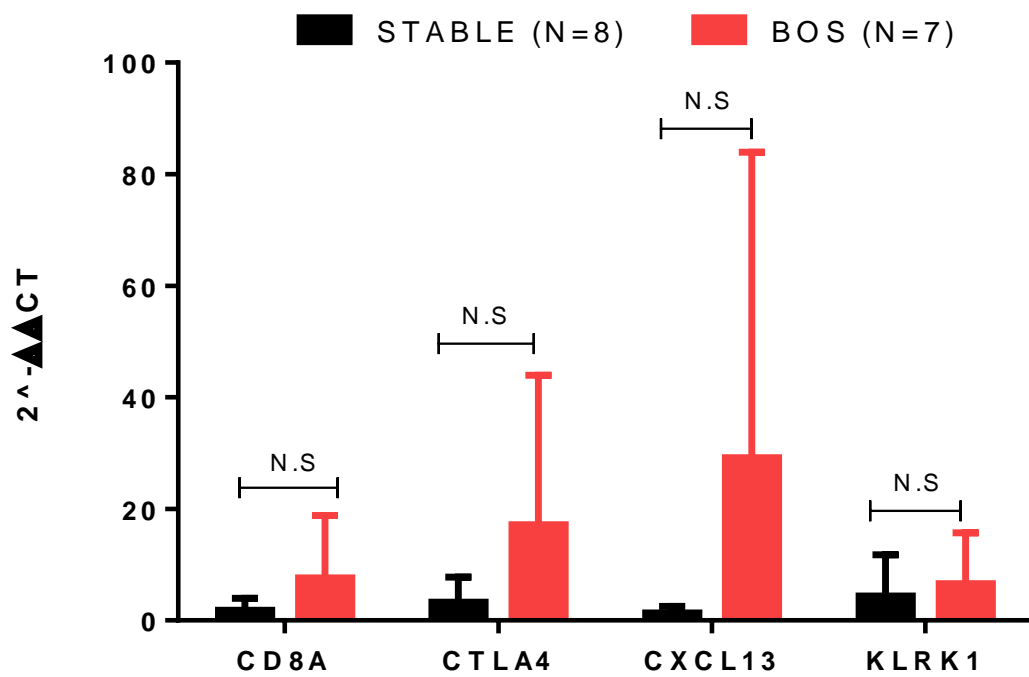

Supplementary Figure 1

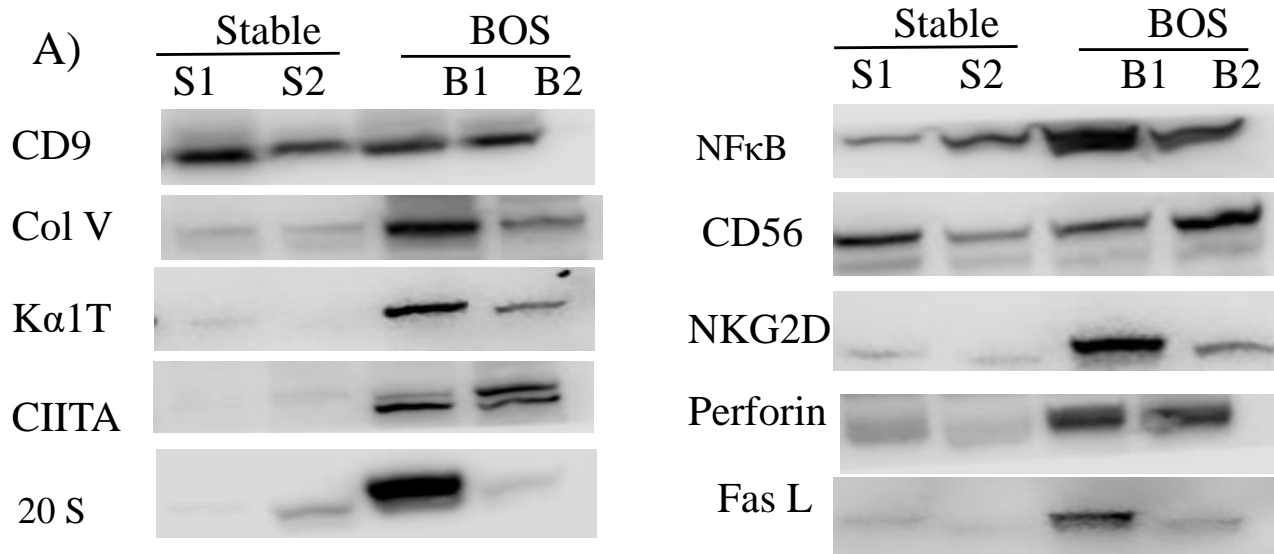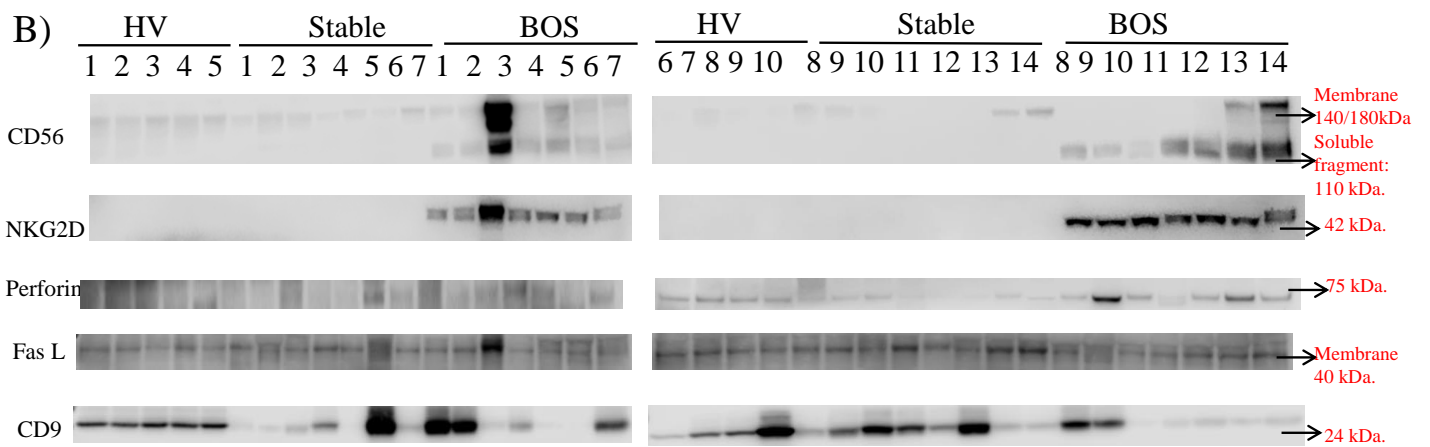

Supplementary Figure 2
